# Supplementary material for: Large scale synthesized sulphonated reduced graphene oxide: a high performance material for electrochemical capacitors
Source: Royal Society of Chemistry journal article supplement (doi:10.1039/c3ra42329h), 2013-01-01
Supplement: c3ra42329h.pdf [file c3ra42329h.pdf]

## Supporting Information

### Large scale synthesized sulphonated reduced graphene oxide: a high performance material for electrochemical capacitor

Haibo Li<sup>a,b</sup>, Ye Wang<sup>a</sup>, Yumeng Shi<sup>a</sup>, Jin Li<sup>b</sup>, Lijun He<sup>b</sup> and Hui Ying Yang<sup>a\*</sup>,

a Pillar of Engineering Product Development, Singapore University of Technology and Design, 20 Dover Drive, Singapore 138682

b Key Laboratory of Ningxia for Photovoltaic Materials, Ningxia University, Helanshan Rd., Yinchuan, Ningxia, P.R. China 750021

#### 1. Experimental section

##### 1). Electrochemical measurement

Typical three electrodes method: A nickel foam coated with RGO/SRGO served as the working electrode, a platinum foil electrode and a saturated calomel electrode (SCE) served as counter and reference electrodes respectively. The measurements were carried out in a 1 M Na<sub>2</sub>SO<sub>4</sub> aqueous electrolyte at room temperature. Cyclic voltammograms (CV), galvanostatic charge/discharge and electrochemical impedance spectroscopy (EIS) were measured by electrochemical workstation (Biglogical VMP3). CV tests were carried out from -0.6 V to 0.4 V (vs. SCE) at different scan rates of 1, 5, 10, 50, 100, 200 and 500 mV/s. Galvanostatic charge/discharge curves were measured in the same potential range with the CV test at different current densities of 200, 500, 1000 and 2000 mA/g, and EIS measurements were explored in the frequency range from 100 kHz to 0.1 Hz at open circuit potential with an AC perturbation of 5 mV. The mass normalized specific capacitance of the electrode can be calculated according to  $C = \int idt/mVv$ , where C is the mass normalized specific capacitance (F/g), i is the current (A), V is the potential (V), v is the potential scan rate (V/s), m is the mass of the electroactive materials in the electrodes (g).

## 2. Supplementary Results

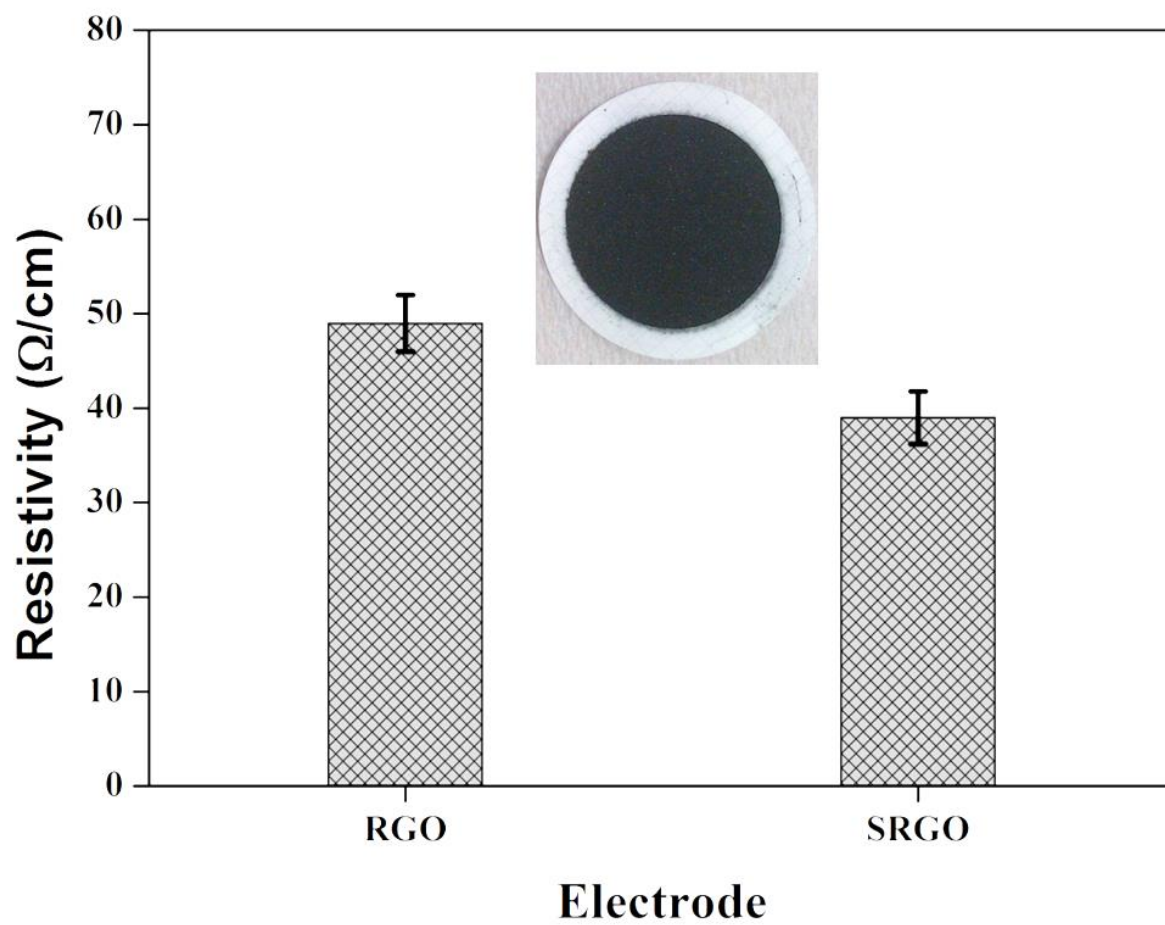

Figure S1 the bulk resistivity of RGO and SRGO samples, inset is a digital image of SRGO film.

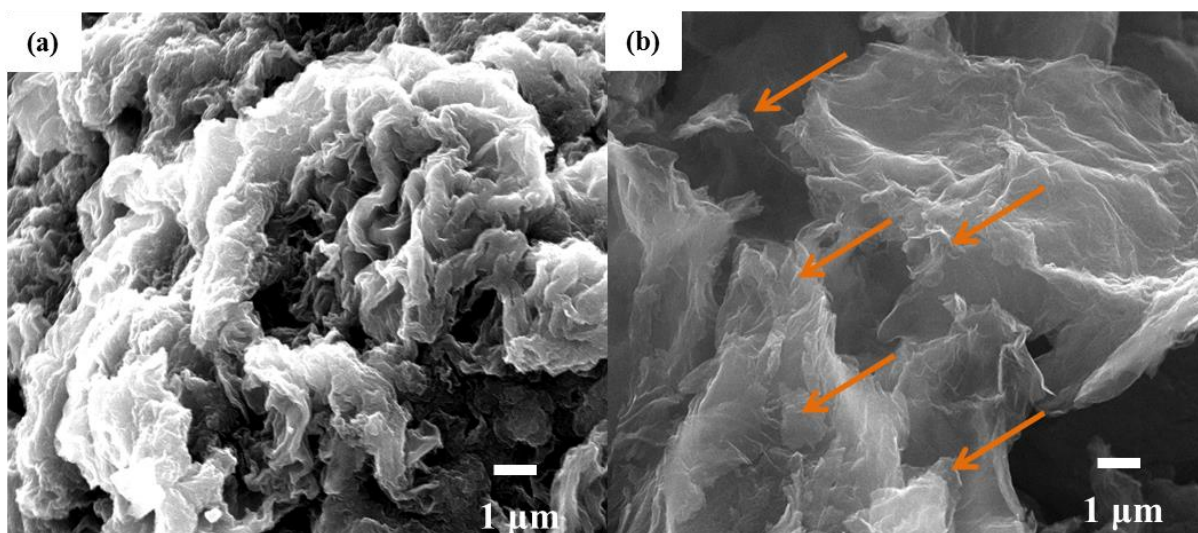

Figure S2 the SEM image of (a) RGO and (b) SRGO. The arrow indicates the small pieces of SRGO nano-sheets presenting on the SRGO nano-sheets, respectively.

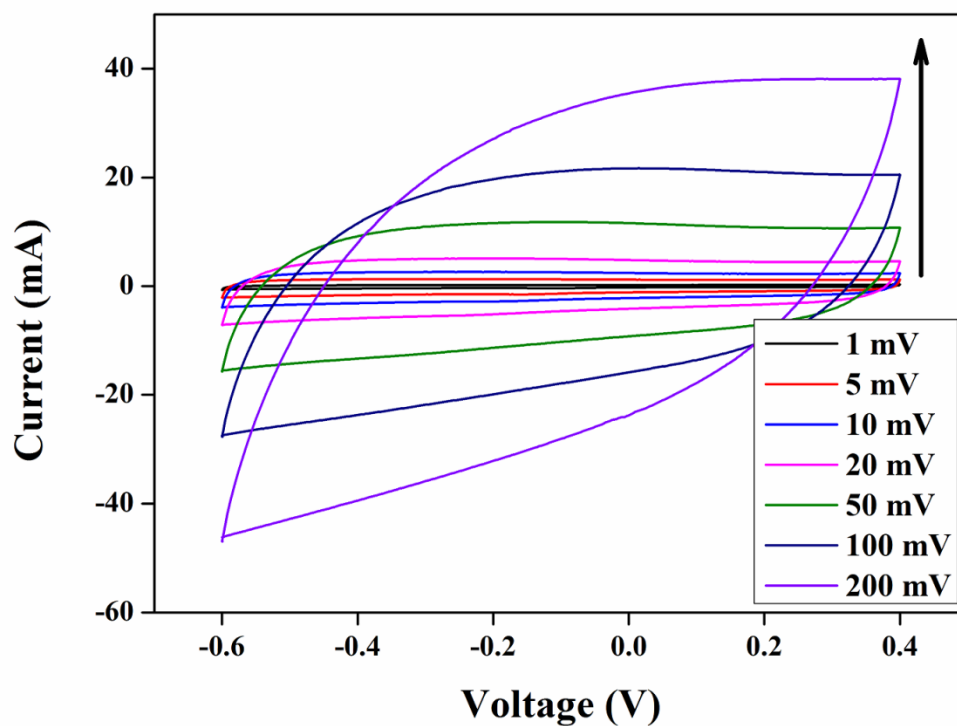

Figure S3 CV curves of RGO at various scan rates (1, 5, 10, 20, 50, 100 and 200 mV/s)
